# Supplementary material
Source: PubMed Central journal article supplement (PMC5915301)
Supplement: NIHMS959322-supplement-Supplement.pdf [file NIHMS959322-supplement-Supplement.pdf]

**Supplementary table 1.** Multiple childhood social risk factor exposure

Childhood cumulative social risk score

---

| <b>Total number of childhood social risk factors</b>  | <b>%</b> |
|-------------------------------------------------------|----------|
| 0                                                     | 7.7      |
| 1                                                     | 17.3     |
| 2                                                     | 22.8     |
| 3                                                     | 20.8     |
| ≥4                                                    | 31.5     |
| <b>Number of childhood socioeconomic risk factors</b> |          |
| 0                                                     | 17.1     |
| 1                                                     | 28.7     |
| 2                                                     | 27.4     |
| ≥3                                                    | 26.7     |
| <b>Number of childhood psychosocial risk factors</b>  |          |
| 0                                                     | 39.8     |
| 1                                                     | 29.8     |
| 2                                                     | 20.5     |
| ≥3                                                    | 9.9      |

**Supplementary table 2.** Promax-rotated factor loadings from exploratory factor analysis of childhood social risk factors based on a 3-factor model

| Item                                       | Factor                                    |                                                                                  |                                  |
|--------------------------------------------|-------------------------------------------|----------------------------------------------------------------------------------|----------------------------------|
|                                            | 1                                         | 2                                                                                | 3                                |
| Low maternal education                     | 0.393                                     | 0.356                                                                            | 0.031                            |
| Low father social class                    | 0.341                                     | 0.276                                                                            | 0.026                            |
| Private landlord                           | 0.796                                     | -0.289                                                                           | -0.052                           |
| Poor amenities                             | 0.505                                     | -0.076                                                                           | -0.121                           |
| Overcrowding                               | 0.136                                     | 0.429                                                                            | -0.032                           |
| Poorly repaired house                      | 0.532                                     | 0.242                                                                            | 0.036                            |
| Unclean child                              | -0.087                                    | 1.079                                                                            | 0.038                            |
| Poorly cleaned house                       | -0.007                                    | 0.954                                                                            | 0.087                            |
| Poor state of child's clothes              | 0.001                                     | 0.849                                                                            | -0.002                           |
| Maltreated                                 | -0.176                                    | 0.230                                                                            | -0.440                           |
| Low parental concern for child's education | 0.166                                     | 0.474                                                                            | -0.031                           |
| Psychiatric history                        | -0.140                                    | 0.267                                                                            | -0.054                           |
| Divorce                                    | -0.026                                    | 0.240                                                                            | -0.221                           |
| Mother affectionless control               | 0.011                                     | -0.079                                                                           | -0.698                           |
| Father affectionless control               | -0.084                                    | -0.141                                                                           | -0.871                           |
| Parent death                               | -0.015                                    | 0.222                                                                            | 0.093                            |
| Maternal separation                        | -0.022                                    | 0.254                                                                            | -0.094                           |
| Descriptive label                          | "Socioeconomic and material disadvantage" | "Overcrowding, physical neglect, and low parental concern for child's education" | "Maladaptive family functioning" |

**Supplementary table 3.** Model Estimation Results of exploratory factor analysis (EFA)

| Factor (s) | RMSEA<br>( $\leq 0.06$ is preferred) | RMSR<br>( $\leq 0.06$ is preferred) |
|------------|--------------------------------------|-------------------------------------|
| 1          | 0.046                                | 0.119                               |
| 2          | 0.029                                | 0.082                               |
| 3          | 0.018                                | 0.061                               |
| 4          | No factor solution                   | No factor solution                  |

RM

RMSEA, root mean square error of approximation  
RMSR, root mean square of the residuals

**Supplementary table 4.** Model Estimation Results of Latent Class Analysis

| <b>Class(es)</b> | <b>Sample size adjusted<br/>BIC</b> | <b>Entropy (<math>\geq 0.8</math> is<br/>preferred)</b> |
|------------------|-------------------------------------|---------------------------------------------------------|
| 1                | 49517.59                            | 1.00                                                    |
| 2                | 47919.22                            | 0.75                                                    |
| 3                | 47038.82                            | 0.65                                                    |
| 4                | 46729.74                            | 0.57                                                    |
| 5                | 46674.44                            | 0.53                                                    |

BIC, Bayesian information criteria
